# Supplementary material for: Environmental Complexity and Reduced Stocking Density Promote Positive Behavioral Outcomes in Broiler Chickens
Source: MDPI journal article supplement (doi:10.3390/ani13132074), 2023-06-23
Supplement: s1 [file s1]

**Supplementary Table S1.** Parameter estimates of the best supported models for counts and duration of chicken behaviors. Predictors included environmental complexity (HC = high complexity), stocking density (LD = low stocking density), week (W), and their interactions. Week 4 (W4) and week 7 (W7) were compared to week 2 as a reference category. Results of post-hoc pairwise comparisons are reported in-text. Significant p-values ( $\leq 0.05$ ) are bolded.

| Behavior        | Model for durations |      |          |                  |      | Model for nonzero counts |      |          |              |      | Model for zero counts |      |          |                  |       |
|-----------------|---------------------|------|----------|------------------|------|--------------------------|------|----------|--------------|------|-----------------------|------|----------|------------------|-------|
|                 | Estimate            | SE   | <i>t</i> | <i>p</i>         | Odds | Estimate                 | SE   | <i>z</i> | <i>p</i>     | Odds | Estimate              | SE   | <i>z</i> | <i>p</i>         | Odds  |
| <b>Active</b>   |                     |      |          |                  |      |                          |      |          |              |      |                       |      |          |                  |       |
| HC              | 0.43                | 0.11 | 3.86     | <b>&lt;0.001</b> | 1.54 | -                        | -    | -        | -            | -    | 0.68                  | 0.29 | 2.33     | <b>0.02</b>      | 1.98  |
| LD              | -                   | -    | -        | -                | -    | -0.14                    | 0.08 | -1.74    | 0.08         | 0.87 | -                     | -    | -        | -                | -     |
| W4              | -0.34               | 0.15 | -2.27    | <b>0.02</b>      | 0.71 | 0.06                     | 0.10 | 0.61     | 0.54         | 1.06 | 2.50                  | 0.46 | 5.48     | <b>&lt;0.001</b> | 12.18 |
| W7              | -0.56               | 0.15 | -3.75    | <b>&lt;0.001</b> | 0.57 | -0.26                    | 0.10 | -2.47    | <b>0.01</b>  | 0.77 | 1.82                  | 0.35 | 5.15     | <b>&lt;0.001</b> | 6.17  |
| <b>Preening</b> |                     |      |          |                  |      |                          |      |          |              |      |                       |      |          |                  |       |
| HC              | 0.26                | 0.11 | 2.16     | <b>0.03</b>      | 1.30 | 0.84                     | 0.37 | 2.26     | <b>0.02</b>  | 2.32 | -                     | -    | -        | -                | -     |
| W4              | -                   | -    | -        | -                | -    | 0.53                     | 0.34 | 1.54     | 0.12         | 1.69 | 1.08                  | 0.24 | 4.48     | <b>&lt;0.001</b> | 2.94  |
| W7              | -                   | -    | -        | -                | -    | 0.88                     | 0.33 | 2.63     | <b>0.008</b> | 2.40 | 0.95                  | 0.24 | 3.96     | <b>&lt;0.001</b> | 2.57  |
| HC:W4           | -                   | -    | -        | -                | -    | -0.36                    | 0.44 | -0.82    | 0.41         | 0.70 | -                     | -    | -        | -                | -     |
| HC:W7           | -                   | -    | -        | -                | -    | -0.98                    | 0.44 | -2.26    | <b>0.02</b>  | 0.37 | -                     | -    | -        | -                | -     |
| <b>Perching</b> |                     |      |          |                  |      |                          |      |          |              |      |                       |      |          |                  |       |
| HC              | -                   | -    | -        | -                | -    | -                        | -    | -        | -            | -    | 3.25                  | 0.73 | 4.45     | <b>&lt;0.001</b> | 25.70 |
| <b>Foraging</b> |                     |      |          |                  |      |                          |      |          |              |      |                       |      |          |                  |       |
| HC              | 0.39                | 0.16 | 2.52     | <b>0.01</b>      | 1.48 | -                        | -    | -        | -            | -    | -0.58                 | 0.37 | -1.57    | 0.11             | 0.56  |
| LD              | -                   | -    | -        | -                | -    | -                        | -    | -        | -            | -    | -0.21                 | 0.37 | -0.57    | 0.57             | 0.81  |
| W4              | -                   | -    | -        | -                | -    | -                        | -    | -        | -            | -    | -0.69                 | 0.46 | -1.52    | 0.13             | 0.50  |
| W7              | -                   | -    | -        | -                | -    | -                        | -    | -        | -            | -    | -1.18                 | 0.49 | -2.41    | <b>0.02</b>      | 0.31  |
| HC:W4           | -                   | -    | -        | -                | -    | -                        | -    | -        | -            | -    | 1.32                  | 0.50 | 2.65     | <b>0.008</b>     | 3.75  |
| HC:W7           | -                   | -    | -        | -                | -    | -                        | -    | -        | -            | -    | 1.06                  | 0.51 | 2.10     | <b>0.04</b>      | 2.89  |
| LD:W4           | -                   | -    | -        | -                | -    | -                        | -    | -        | -            | -    | 0.82                  | 0.50 | 1.65     | 0.10             | 2.28  |
| LD:W7           | -                   | -    | -        | -                | -    | -                        | -    | -        | -            | -    | 1.51                  | 0.52 | 2.92     | <b>0.004</b>     | 4.52  |
| <b>Eating</b>   |                     |      |          |                  |      |                          |      |          |              |      |                       |      |          |                  |       |
| HC              | -                   | -    | -        | -                | -    | -                        | -    | -        | -            | -    | 0.05                  | 0.32 | 0.16     | 0.87             | 1.05  |
| LD              | -                   | -    | -        | -                | -    | -0.53                    | 0.27 | -1.97    | <b>0.05</b>  | 0.59 | 0.58                  | 0.31 | 1.89     | <b>0.05</b>      | 1.78  |
| W4              | -0.47               | 0.25 | -1.90    | <b>0.05</b>      | 0.63 | -                        | -    | -        | -            | -    | 0.79                  | 0.28 | 2.81     | <b>0.005</b>     | 2.21  |
| W7              | -0.62               | 0.26 | -2.39    | <b>0.02</b>      | 0.54 | -                        | -    | -        | -            | -    | 0.38                  | 0.29 | 1.32     | 0.19             | 1.46  |
| HC:LD           | -                   | -    | -        | -                | -    | -                        | -    | -        | -            | -    | -0.85                 | 0.45 | -1.90    | <b>0.05</b>      | 0.43  |

|                   |       |      |       |                  |      |       |      |       |                  |      |       |      |       |                  |      |
|-------------------|-------|------|-------|------------------|------|-------|------|-------|------------------|------|-------|------|-------|------------------|------|
| <b>Drinking</b>   |       |      |       |                  |      |       |      |       |                  |      |       |      |       |                  |      |
| LD                | 0.35  | 0.16 | 2.16  | <b>0.03</b>      | 1.41 | -     | -    | -     | -                | -    | -     | -    | -     | -                | -    |
| W4                | -0.08 | 0.20 | -0.40 | 0.69             | 0.92 | -1.14 | 0.29 | -3.93 | <b>&lt;0.001</b> | 0.32 | 0.53  | 0.26 | 2.02  | <b>0.04</b>      | 1.71 |
| W7                | 0.40  | 0.21 | 1.91  | <b>0.05</b>      | 1.49 | -0.05 | 0.28 | -0.19 | 0.85             | 0.95 | 0.03  | 0.28 | 0.10  | 0.92             | 1.03 |
| <b>Locomotion</b> |       |      |       |                  |      |       |      |       |                  |      |       |      |       |                  |      |
| HC                | -     | -    | -     | -                | -    | 1.25  | 0.39 | 3.22  | <b>0.002</b>     | 3.48 | -     | -    | -     | -                | -    |
| LD                | -     | -    | -     | -                | -    | 0.88  | 0.39 | 2.23  | <b>0.03</b>      | 2.41 | -     | -    | -     | -                | -    |
| W4                | -0.23 | 0.11 | -1.98 | <b>0.05</b>      | 0.80 | 0.93  | 0.38 | 2.46  | <b>0.01</b>      | 2.54 | 1.38  | 0.26 | 5.35  | <b>&lt;0.001</b> | 3.96 |
| W7                | -0.60 | 0.12 | -4.92 | <b>&lt;0.001</b> | 0.55 | 0.57  | 0.39 | 1.46  | 0.15             | 1.77 | 0.64  | 0.23 | 2.78  | <b>0.005</b>     | 1.89 |
| HC:W4             | -     | -    | -     | -                | -    | -1.22 | 0.45 | -2.74 | <b>0.01</b>      | 0.30 | -     | -    | -     | -                | -    |
| HC:W7             | -     | -    | -     | -                | -    | -1.47 | 0.47 | -3.10 | <b>0.002</b>     | 0.23 | -     | -    | -     | -                | -    |
| LD:W4             | -     | -    | -     | -                | -    | -1.00 | 0.46 | -2.19 | <b>0.03</b>      | 0.37 | -     | -    | -     | -                | -    |
| LD:W7             | -     | -    | -     | -                | -    | -1.50 | 0.48 | -3.11 | <b>0.002</b>     | 0.22 | -     | -    | -     | -                | -    |
| HC:LD             | -     | -    | -     | -                | -    | -1.49 | 0.49 | -3.07 | <b>0.002</b>     | 0.23 | -     | -    | -     | -                | -    |
| HC:LD:W4          | -     | -    | -     | -                | -    | 1.00  | 0.59 | 1.71  | 0.09             | 2.72 | -     | -    | -     | -                | -    |
| HC:LD:W7          | -     | -    | -     | -                | -    | 1.64  | 0.64 | 2.56  | <b>0.01</b>      | 5.14 | -     | -    | -     | -                | -    |
| <b>Inactive</b>   |       |      |       |                  |      |       |      |       |                  |      |       |      |       |                  |      |
| HC                | -     | -    | -     | -                | -    | 0.63  | 0.20 | 3.06  | <b>0.002</b>     | 1.87 | -3.24 | 1.03 | -3.15 | <b>0.002</b>     | 0.04 |
| LD                | -     | -    | -     | -                | -    | 0.36  | 0.25 | 1.48  | 0.14             | 1.44 | -     | -    | -     | -                | -    |
| W4                | -     | -    | -     | -                | -    | 0.95  | 0.23 | 4.11  | <b>&lt;0.001</b> | 2.59 | 1.35  | 0.49 | 2.75  | <b>0.006</b>     | 3.86 |
| W7                | -     | -    | -     | -                | -    | 1.34  | 0.23 | 5.82  | <b>&lt;0.001</b> | 3.82 | NA    | NA   | NA    | NA               | NA   |
| HC:W4             | -     | -    | -     | -                | -    | -0.58 | 0.29 | -1.98 | <b>0.05</b>      | 0.56 | -     | -    | -     | -                | -    |
| HC:W7             | -     | -    | -     | -                | -    | -0.64 | 0.29 | -2.22 | <b>0.03</b>      | 0.53 | -     | -    | -     | -                | -    |
| LD:W4             | -     | -    | -     | -                | -    | -0.48 | 0.30 | -1.62 | 0.11             | 0.62 | -     | -    | -     | -                | -    |
| LD:W7             | -     | -    | -     | -                | -    | -0.84 | 0.29 | -2.90 | <b>0.004</b>     | 0.43 | -     | -    | -     | -                | -    |
| HC:LD             | -     | -    | -     | -                | -    | -0.97 | 0.33 | -2.94 | <b>0.003</b>     | 0.38 | -     | -    | -     | -                | -    |
| HC:LD:W4          | -     | -    | -     | -                | -    | 0.90  | 0.41 | 2.22  | <b>0.03</b>      | 2.47 | -     | -    | -     | -                | -    |
| HC:LD:W7          | -     | -    | -     | -                | -    | 1.14  | 0.39 | 2.90  | <b>0.004</b>     | 3.13 | -     | -    | -     | -                | -    |
